# Supplementary material for: De-duplicating patient records from three independent data sources reveals the incidence of rare neuromuscular disorders in Germany
Source: PubMed Central journal article supplement (PMC6591958; doi:10.1186/s13023-019-1125-2), 2019-06-24
Supplement: 13023_2019_1125_MOESM1_ESM.pdf [file 13023_2019_1125_MOESM1_ESM.pdf]

### Data provided by the different data sources

|                                                                | <b>Neuromuscular centers</b> | <b>Patient registry</b> | <b>Genetic institutes</b> |
|----------------------------------------------------------------|------------------------------|-------------------------|---------------------------|
| Year of birth                                                  | x                            | x                       | x                         |
| Vital status of the patient                                    | x                            | x                       |                           |
| Diagnosis of the disease                                       | x                            | x                       | x                         |
| Clinical classification of SMA types and dystrophinopathies    | x                            | x                       |                           |
| Two first digits of the postal code of the patients' residence | x                            | x                       | x                         |
| Age at diagnosis (only in SMA)                                 |                              |                         | x                         |
| Genetic testing approach (only in dystrophinopathies)          |                              |                         | x                         |
