# Supplementary material for: De-duplicating patient records from three independent data sources reveals the incidence of rare neuromuscular disorders in Germany
Source: PubMed Central journal article supplement (PMC6591958; doi:10.1186/s13023-019-1125-2), 2019-06-24
Supplement: 13023_2019_1125_MOESM2_ESM.pdf [file 13023_2019_1125_MOESM2_ESM.pdf]

### Comparison of data regarding age at genetic diagnosis and SMA type

| Age at genetic diagnosis / SMA type | Within the first 6 months of life | Between the age of 6 and 18 months | After the age of 18 months | Total |
|-------------------------------------|-----------------------------------|------------------------------------|----------------------------|-------|
| SMA type 1                          | 105                               | 42                                 | 0                          | 147   |
| SMA type 2                          | 6                                 | 97                                 | 53                         | 156   |
| SMA type 3                          | 0                                 | 6                                  | 81                         | 87    |
| Total                               | 111                               | 145                                | 134                        | 390   |

Data only refers to patients identified by both a neuromuscular center (information about SMA type) and a genetic institute (information about age at genetic diagnosis).
