# Supplementary material for: De-duplicating patient records from three independent data sources reveals the incidence of rare neuromuscular disorders in Germany
Source: PubMed Central journal article supplement (PMC6591958; doi:10.1186/s13023-019-1125-2), 2019-06-24
Supplement: 13023_2019_1125_MOESM3_ESM.pdf [file 13023_2019_1125_MOESM3_ESM.pdf]

**Incidences based on the updated natality rate in Germany for spinal muscular atrophy (SMA)**

| <b>Year of birth</b> | <b>Natality rate in Germany</b> | <b>Distinct patients with SMA</b> | <b>Incidence per 10,000</b> |
|----------------------|---------------------------------|-----------------------------------|-----------------------------|
| 1995                 | 765221                          | 21                                | 0.27                        |
| 1996                 | 796013                          | 29                                | 0.36                        |
| 1997                 | 812173                          | 22                                | 0.27                        |
| 1998                 | 785034                          | 35                                | 0.45                        |
| 1999                 | 770744                          | 52                                | 0.67                        |
| 2000                 | 766999                          | 67                                | 0.87                        |
| 2001                 | 734475                          | 81                                | 1.10                        |
| 2002                 | 719250                          | 55                                | 0.76                        |
| 2003                 | 706721                          | 62                                | 0.88                        |
| 2004                 | 705622                          | 65                                | 0.92                        |
| 2005                 | 685795                          | 67                                | 0.98                        |
| 2006                 | 672724                          | 72                                | 1.07                        |
| 2007                 | 684862                          | 44                                | 0.64                        |
| 2008                 | 682514                          | 50                                | 0.73                        |
| 2009                 | 665126                          | 68                                | 1.02                        |
| 2010                 | 677947                          | 73                                | 1.08                        |
| 2011                 | 662685                          | 59                                | 0.89                        |
| 2012                 | 673544                          | 63                                | 0.94                        |
| 2013                 | 682069                          | 66                                | 0.97                        |
| 2014                 | 714927                          | 97                                | 1.36                        |
| 2015                 | 737575                          | 59                                | 0.80                        |
| 2016                 | 792121                          | 51                                | 0.64                        |
| 2017                 | 785000                          | 25                                | 0.32                        |

**Incidences based on the updated natality rate of male births in Germany for Duchenne muscular dystrophy (DMD)**

| <b>Year of birth</b> | <b>Male births in Germany</b> | <b>Distinct patients with DMD</b> | <b>Incidence of DMD per 10,000</b> |
|----------------------|-------------------------------|-----------------------------------|------------------------------------|
| 1995                 | 392729                        | 75                                | 1.91                               |
| 1996                 | 409213                        | 68                                | 1.66                               |
| 1997                 | 417006                        | 76                                | 1.82                               |
| 1998                 | 402865                        | 83                                | 2.06                               |
| 1999                 | 396296                        | 84                                | 2.12                               |
| 2000                 | 393323                        | 77                                | 1.96                               |
| 2001                 | 377586                        | 97                                | 2.57                               |
| 2002                 | 369277                        | 68                                | 1.84                               |
| 2003                 | 362709                        | 74                                | 2.04                               |
| 2004                 | 362017                        | 82                                | 2.27                               |
| 2005                 | 351757                        | 77                                | 2.19                               |
| 2006                 | 345816                        | 85                                | 2.46                               |
| 2007                 | 351839                        | 73                                | 2.07                               |
| 2008                 | 349862                        | 57                                | 1.63                               |
| 2009                 | 341249                        | 63                                | 1.85                               |
| 2010                 | 347237                        | 65                                | 1.87                               |
| 2011                 | 339899                        | 57                                | 1.68                               |
| 2012                 | 345629                        | 52                                | 1.50                               |
| 2013                 | 349820                        | 43                                | 1.23                               |
| 2014                 | 366835                        | 43                                | 1,17                               |
| 2015                 | 378478                        | 19                                | 0.50                               |
| 2016                 | 405585                        | 9                                 | 0.22                               |
| 2017                 | 402510                        | 6                                 | 0.15                               |
