# Supplementary material for: De-duplicating patient records from three independent data sources reveals the incidence of rare neuromuscular disorders in Germany
Source: Springer Nature journal article supplement (doi:10.1186/s13023-019-1125-2), 2019-06-24

**Distinct patients per 100,000 inhabitants allocated to the first digit of the postal code with dystrophinopathies (A) or SMA (B)**

**A**

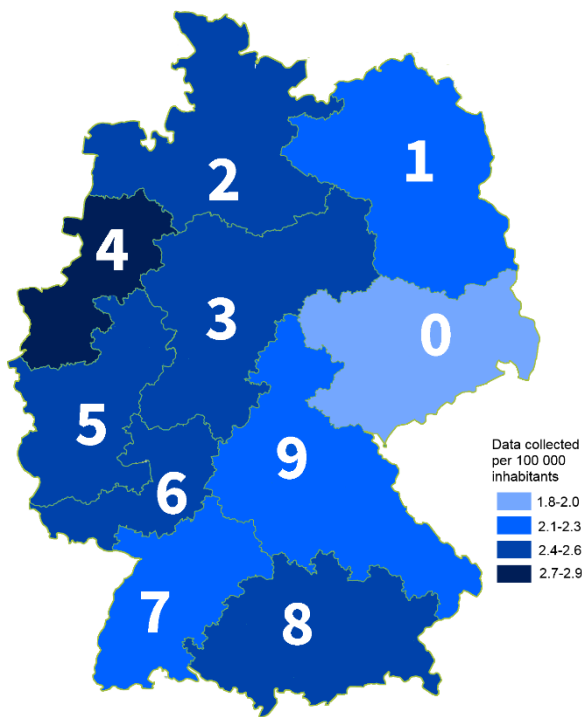

**B**

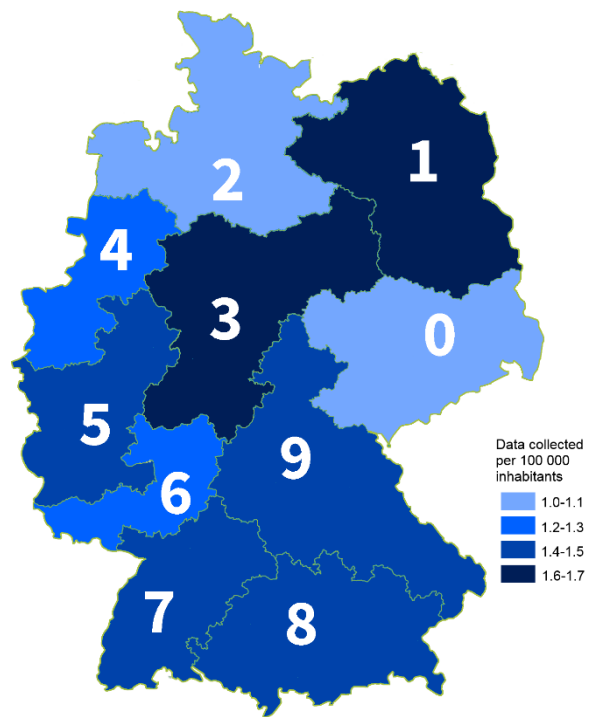

Supplement: MOESM4 [file 16847898]
